# Supplementary material for: A Novel Tissue-Free Method to Estimate Tumor-Derived Cell-Free DNA Quantity Using Tumor Methylation Patterns
Source: MDPI journal article supplement (doi:10.3390/cancers16010082), 2023-12-23
Supplement: s1 [file s1]

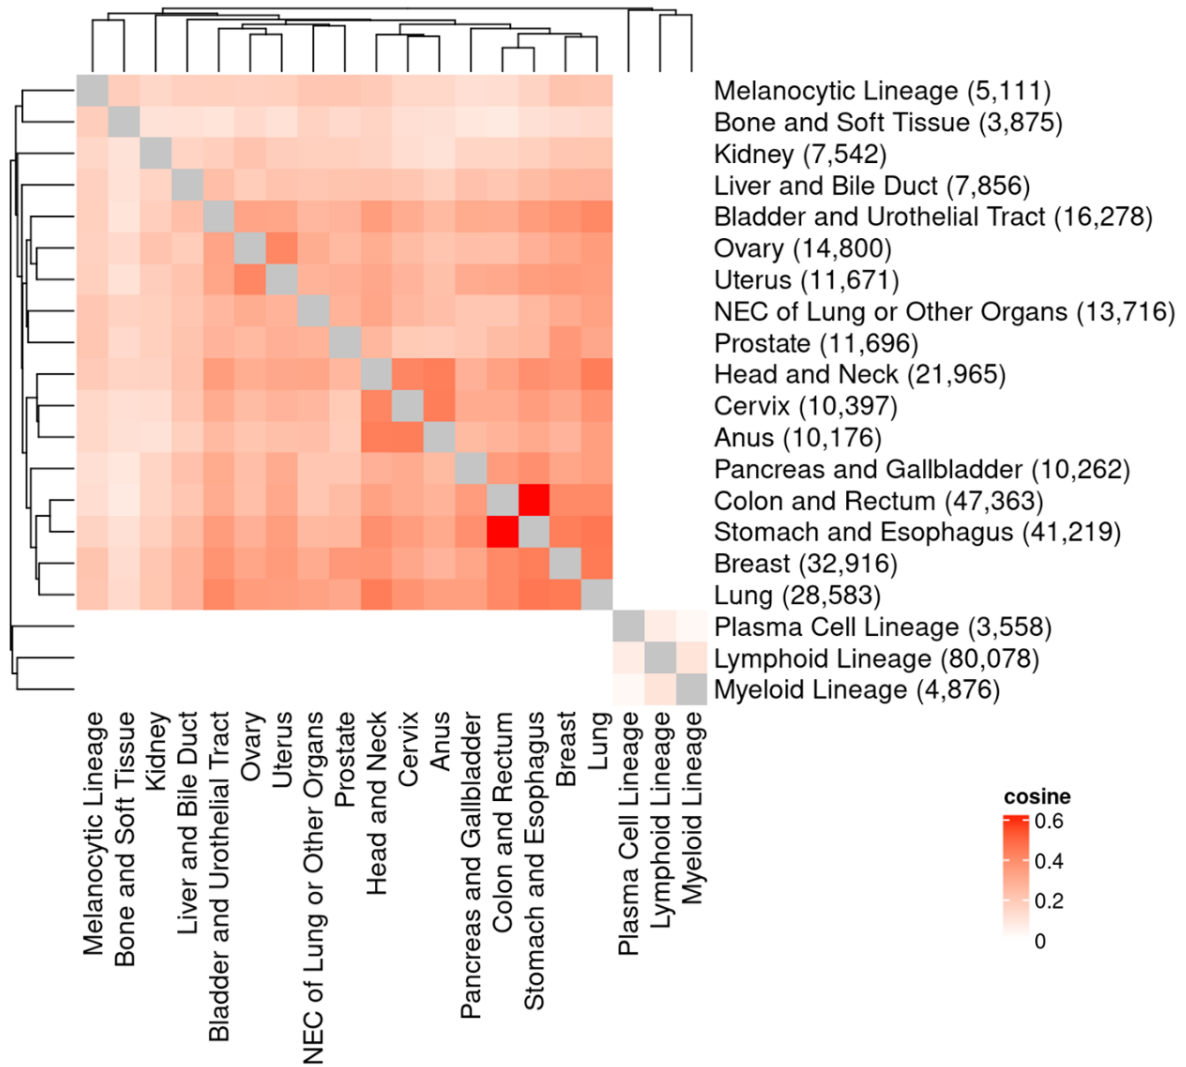

**Figure S1. DMR clustering across cancer labels.** A heatmap depicting the cosine similarity between DMRs defined for each cancer label relative to non-cancer cfDNA.

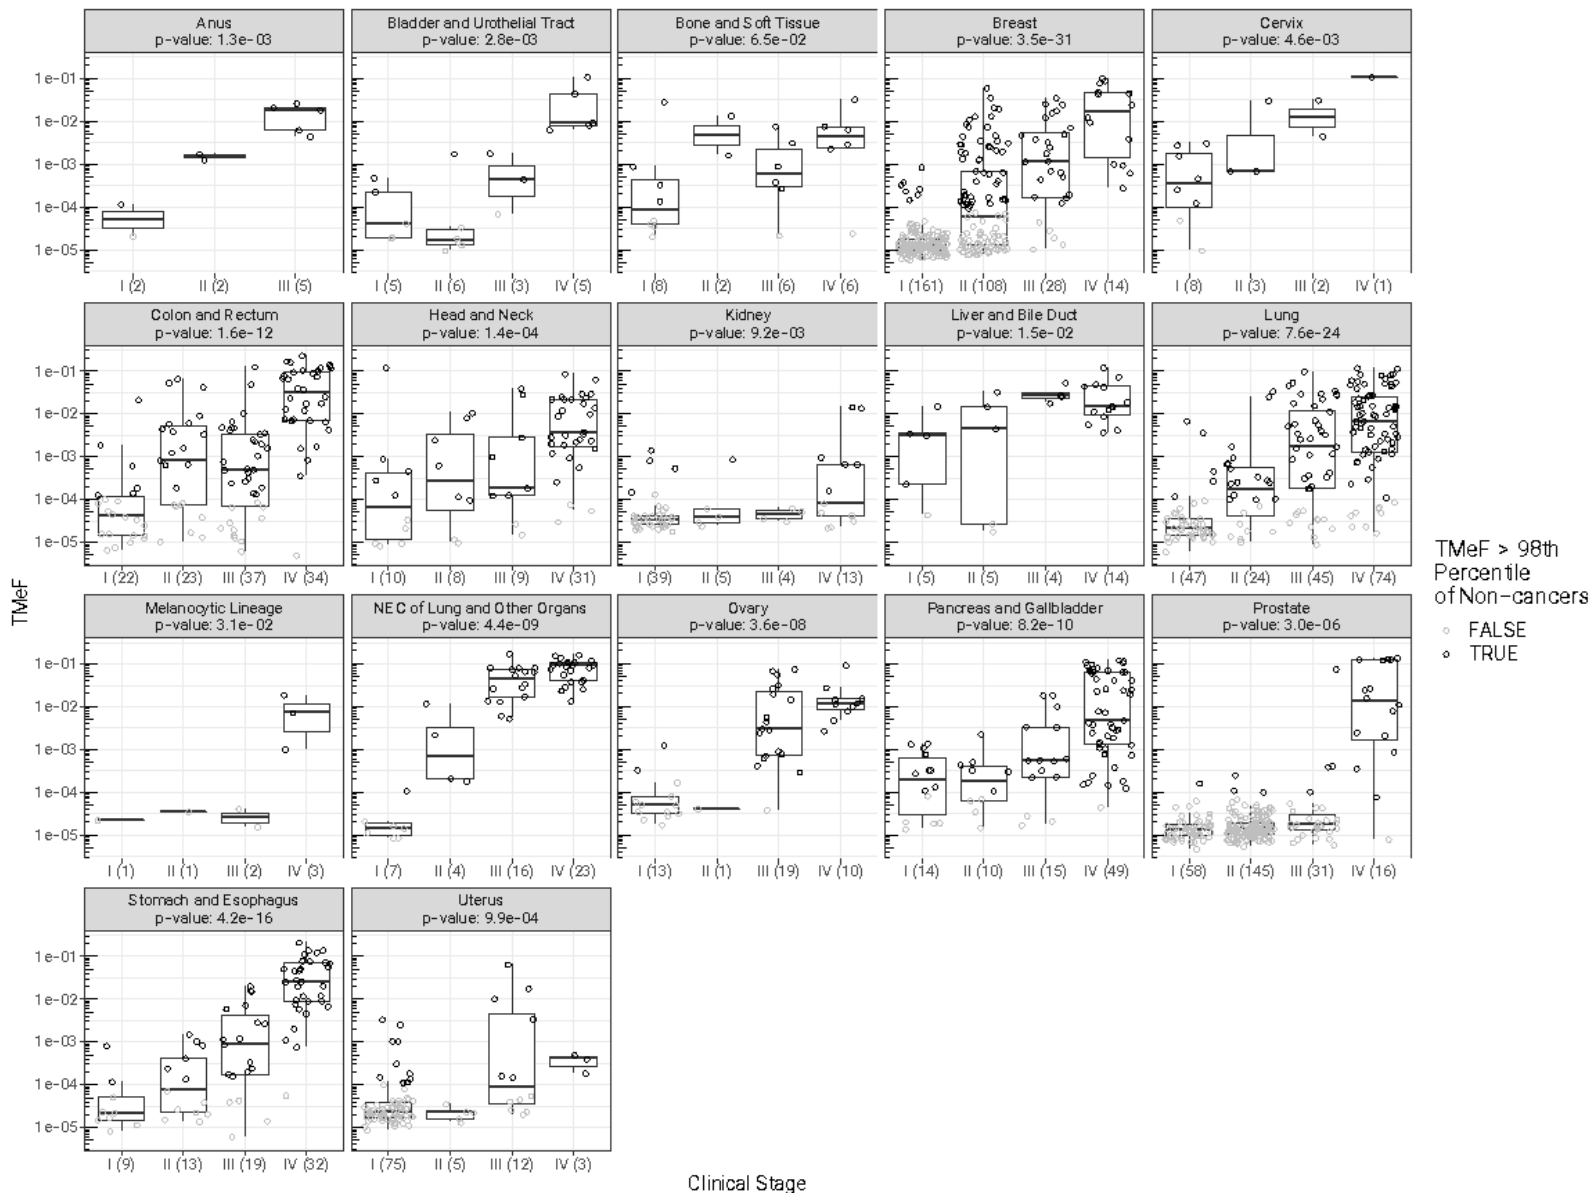

**Figure S2. TMeF correlation with clinical stage by cancer label.** TMeF for 1434 pre-treatment, solid cancer samples from CCGA substudy 3 was plotted by clinical stage and faceted by cancer label. Points were colored gray if the sample's TMeF was lower than the 98th percentile of TMeFs computed on a set of non-cancer samples to indicate that these TMeF values were less reliable. Statistical significance was assessed using a Spearman rank correlation of TMeF versus stage and corrected for multiple testing using a Benjamini Hochberg FDR correction.

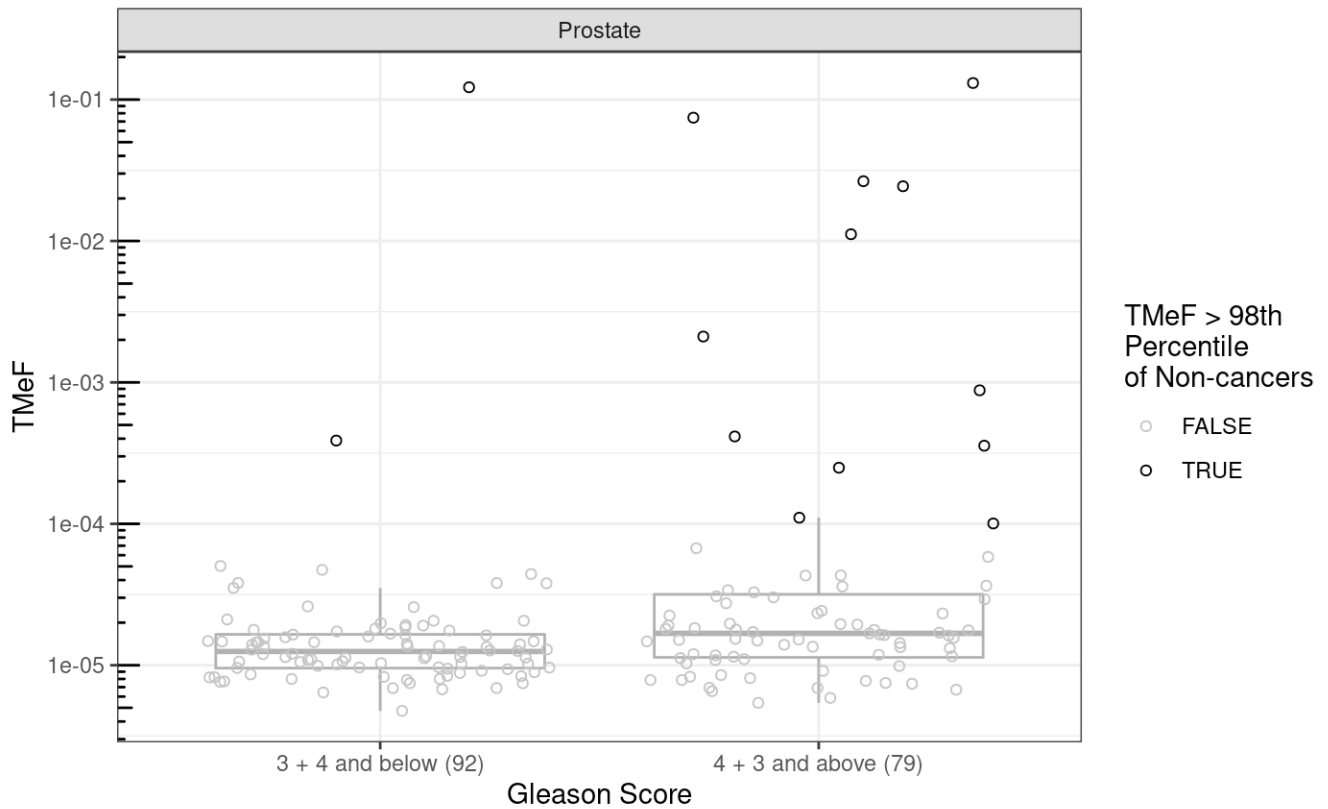

**Figure S3. TMeF correlation with Gleason score in prostate cancer.** TMeF for 171 prostate cancer samples was plotted by Gleason score category, 3 + 4 and below or 4 + 3 and above. Points were colored gray if the sample's TMeF was lower than the 98th percentile of TMeFs computed on a set of non-cancer samples to indicate that these TMeF values were less accurate. A p-value of 0.0035 was determined by dichotomizing each Gleason score group into samples with TMeF greater than and less than the 98th percentile of non-cancer TMeFs, then performing Fisher's exact test for count data.

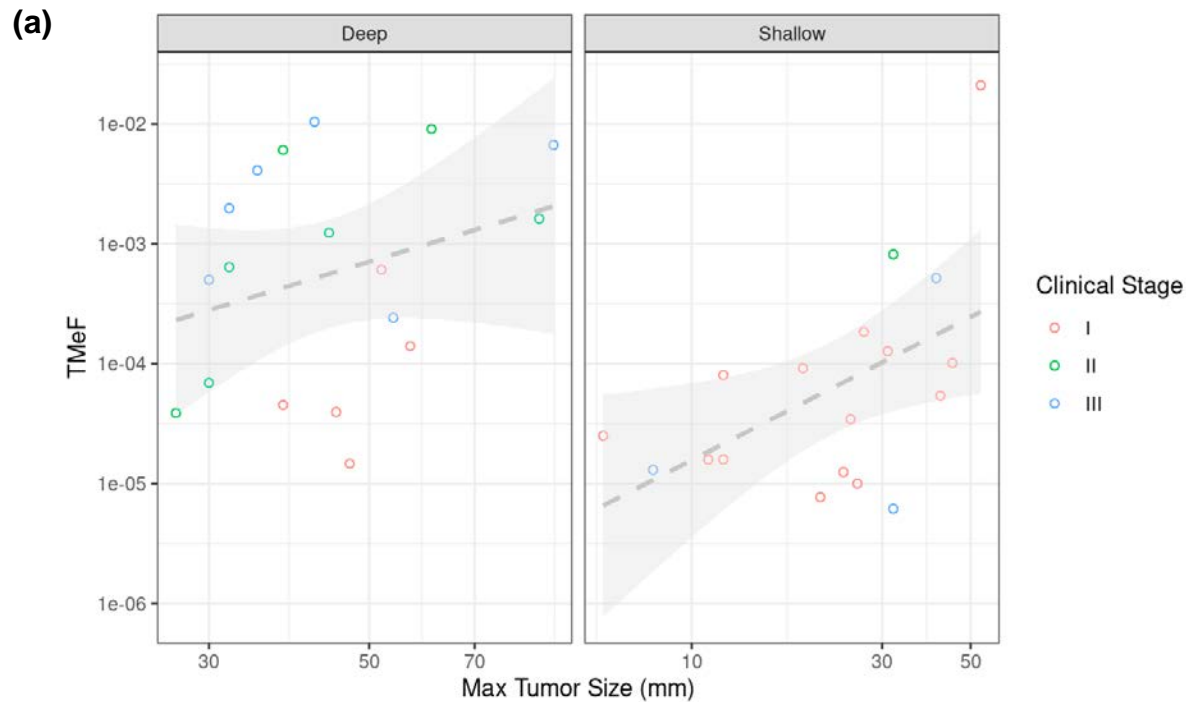

(b)

| Term                      | Value      | P-value | Invasion |
|---------------------------|------------|---------|----------|
| Slope                     | $10^{-14}$ | 0.009*  | Deep     |
| Tumor-size scaling factor | 1.8        | 0.2     | Deep     |
| Slope                     | $10^{-15}$ | <0.001  | Shallow  |
| Tumor-size scaling factor | 1.7        | 0.031*  | Shallow  |

**Figure S4. Association of TMeF with tumor size in colorectal cancer.** (a) TMeF was plotted against the maximum tumor size for deep and shallow invading colorectal cancers as previously modeled in Bredno *et al.*<sup>1</sup> (b) Tumor shedding as a function of tumor size was modeled (see Methods) to ascertain both a measurement of the linear slope between TMeF and tumor size (observed as an intercept offset on the log-log plot) and the scaling factor associated with tumor size (observed as a slope on the log-log plot). \* $p < 0.05$ .

<sup>1</sup>Bredno J, Lipson J, Venn O, Aravanis AM, Jamshidi A. Clinical correlates of circulating cell-free DNA tumor fraction. Bauckneht M, ed. PLOS ONE. 2021;16(8):e0256436. doi:10.1371/journal.pone.0256436

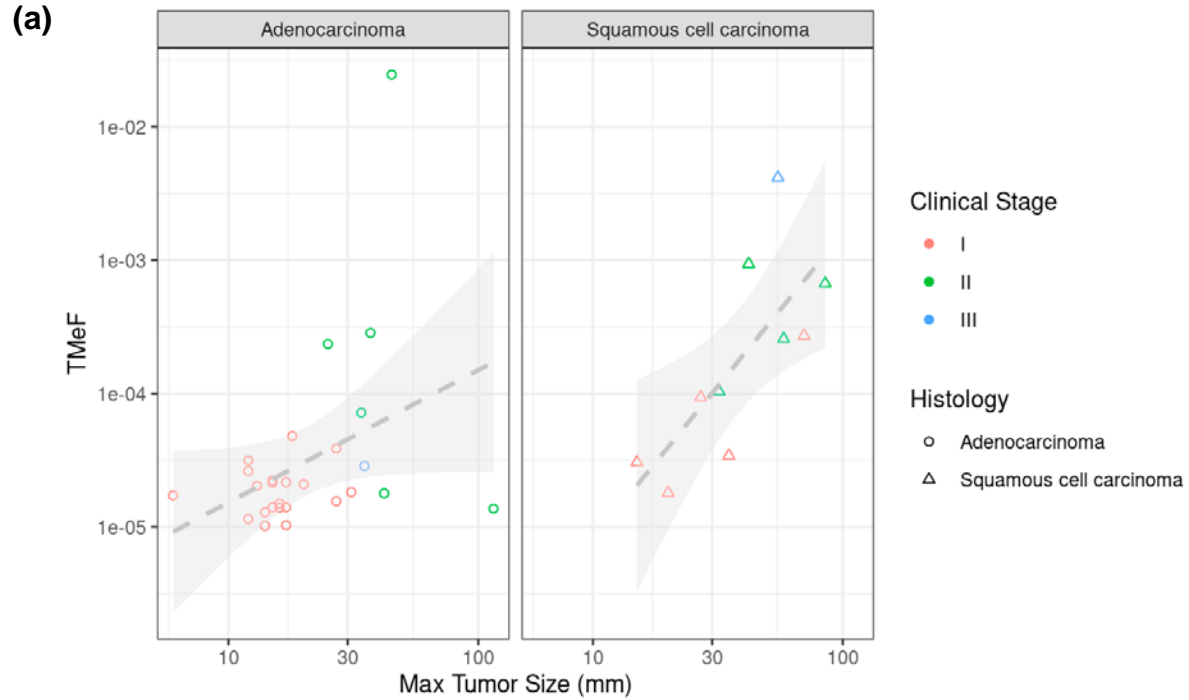

(b)

| Term                      | Value      | P-value    | Histology |
|---------------------------|------------|------------|-----------|
| Slope                     | $10^{-13}$ | $<0.001^*$ | Adeno     |
| Tumor-size scaling factor | 1.0        | 0.048*     | Adeno     |
| Slope                     | $10^{-17}$ | $<0.001^*$ | SCC       |
| Tumor-size scaling factor | 2.3        | 0.012*     | SCC       |

**Figure S5. Association of TMeF with tumor size in NSCLC.** (a) TMeF was plotted against the maximum tumor size for lung adenocarcinoma and lung squamous cell carcinoma. (b) Tumor shedding as a function of tumor size was modeled (see Methods) to ascertain both a measurement of the linear slope between TMeF and tumor size (observed as an intercept offset on the log-log plot) and the scaling factor associated with tumor size (observed as a slope on the log-log plot). \* $p < 0.05$ .

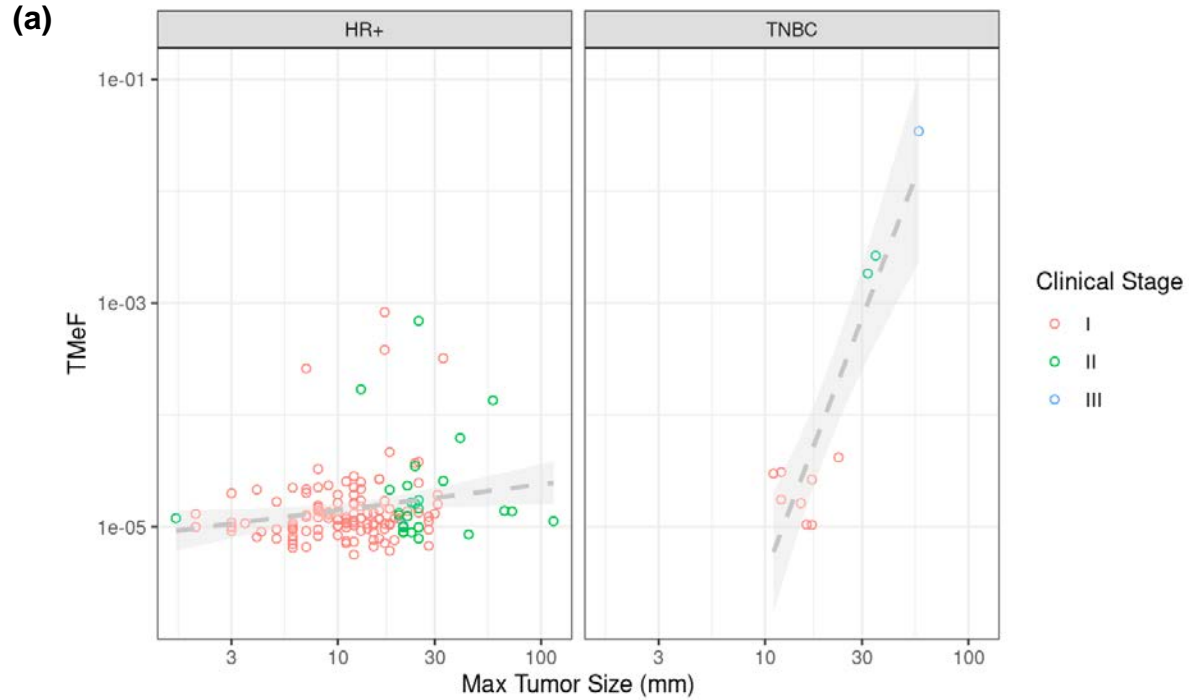

(b)

| Term                      | Value      | P-value | Subtype |
|---------------------------|------------|---------|---------|
| Slope                     | $10^{-12}$ | <0.001* | HR+     |
| Tumor-size scaling factor | 0.23       | 0.02*   | HR+     |
| Slope                     | $10^{-24}$ | <0.001* | TNBC    |
| Tumor-size scaling factor | 4.8        | <0.001* | TNBC    |

**Figure S6. Association of TMeF with tumor size in breast cancer.** (a) TMeF was plotted against the maximum tumor size for hormone receptor positive (HR+) and triple negative breast cancer (TNBC). (b) Tumor shedding as a function of tumor size was modeled (see Methods) to ascertain both a measurement of the linear slope between TMeF and tumor size (observed as an intercept offset on the log-log plot) and the scaling factor associated with tumor size (observed as a slope on the log-log plot). The HR+ model is included for completeness; however, the fit was poor. This may be due to the limit of quantification of TMeF and/or the importance of unmodeled tumor characteristics. \* $p < 0.05$ .

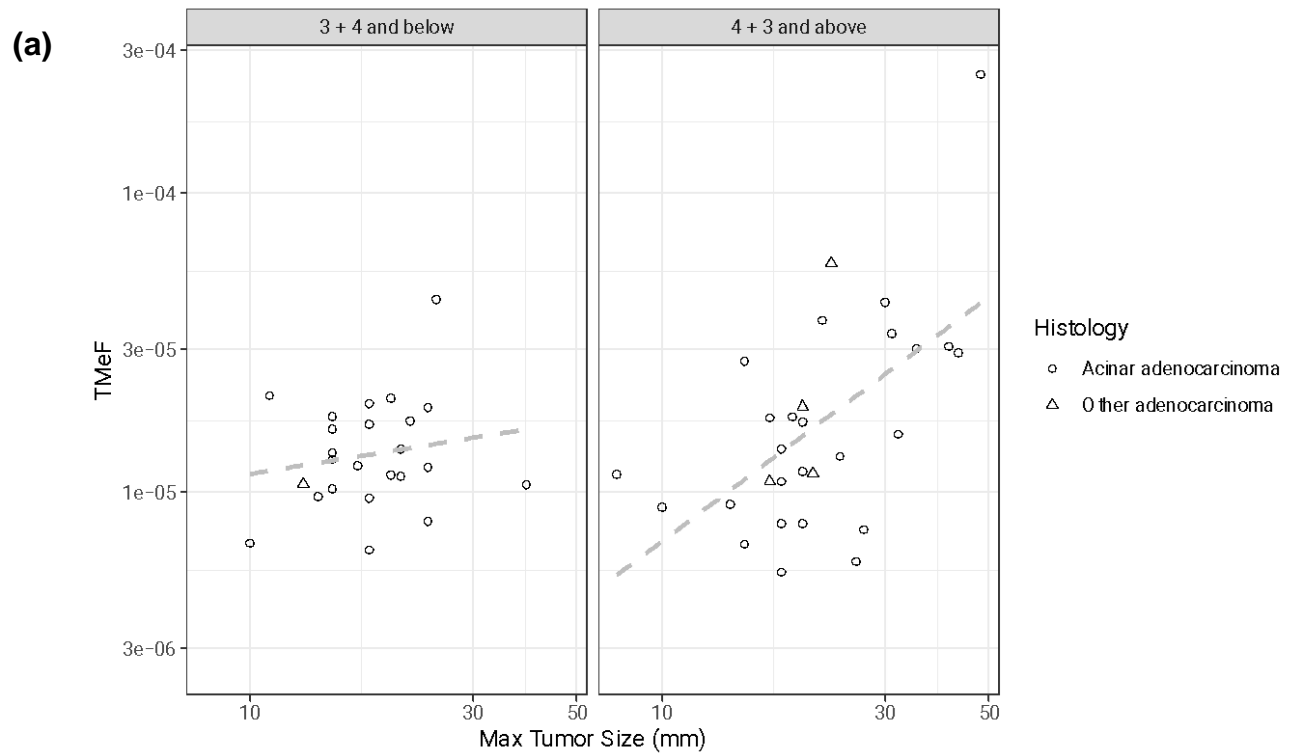

(b)

| Term                             | Value      | P-value    | Gleason         |
|----------------------------------|------------|------------|-----------------|
| Slope w/ lymph node involvement  | $10^{-11}$ | $<0.001^*$ | 3 + 4 and below |
| Slope w/o lymph node involvement | $10^{-12}$ | $<0.001^*$ | 3 + 4 and below |
| Tumor-size scaling factor        | 0.25       | 0.5        | 3 + 4 and below |
| Slope w/ lymph node involvement  | $10^{-13}$ | $<0.001^*$ | 4 + 3 and above |
| Slope w/o lymph node involvement | $10^{-14}$ | $<0.001^*$ | 4 + 3 and above |
| Tumor-size scaling factor        | 1          | $<0.001^*$ | 4 + 3 and above |

**Figure S7. Association of TMeF with tumor size in prostate cancer.** (a) TMeF was plotted against the maximum tumor size for Gleason 3 + 4 and below and Gleason 4 + 3 and above prostate cancer participants. Involvement of one or more lymph nodes was modeled as a factor altering the slope. (b) Tumor shedding as a function of tumor size was modeled (see Methods) to ascertain both a measurement of the linear slope between TMeF and tumor size (observed as an intercept offset on the log-log plot) and the scaling factor associated with tumor size (observed as a slope on the log-log plot). The models are included for completeness; however, the fits were poor. This may be due to the limit of quantification of TMeF and/or the importance of unmodeled tumor characteristics.  $^*p < 0.05$ .

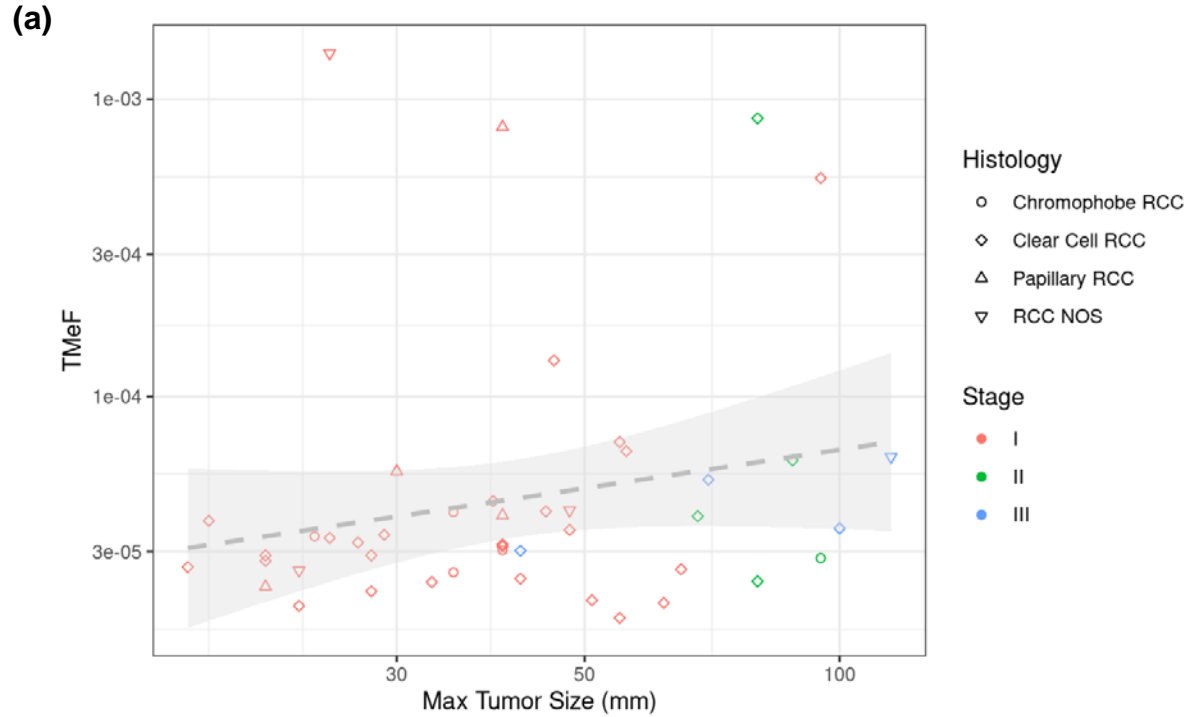

(b)

| Term                      | Value      | P-value |
|---------------------------|------------|---------|
| Slope                     | $10^{-12}$ | <0.001* |
| Tumor-size scaling factor | 0.43       | 0.2     |

**Figure S8. Association of TMeF with tumor size in kidney cancer.** (a) TMeF was plotted against the maximum tumor size for kidney cancers. (b) Tumor shedding as a function of tumor size was modeled (see Methods) to ascertain both a measurement of the linear slope between TMeF and tumor size (observed as an intercept offset on the log-log plot) and the scaling factor associated with tumor size (observed as a slope on the log-log plot). The model is included for completeness; however, the fit was poor. This may be due to the limit of quantification of TMeF and/or the importance of unmodeled tumor characteristics.

\* $p < 0.05$ .



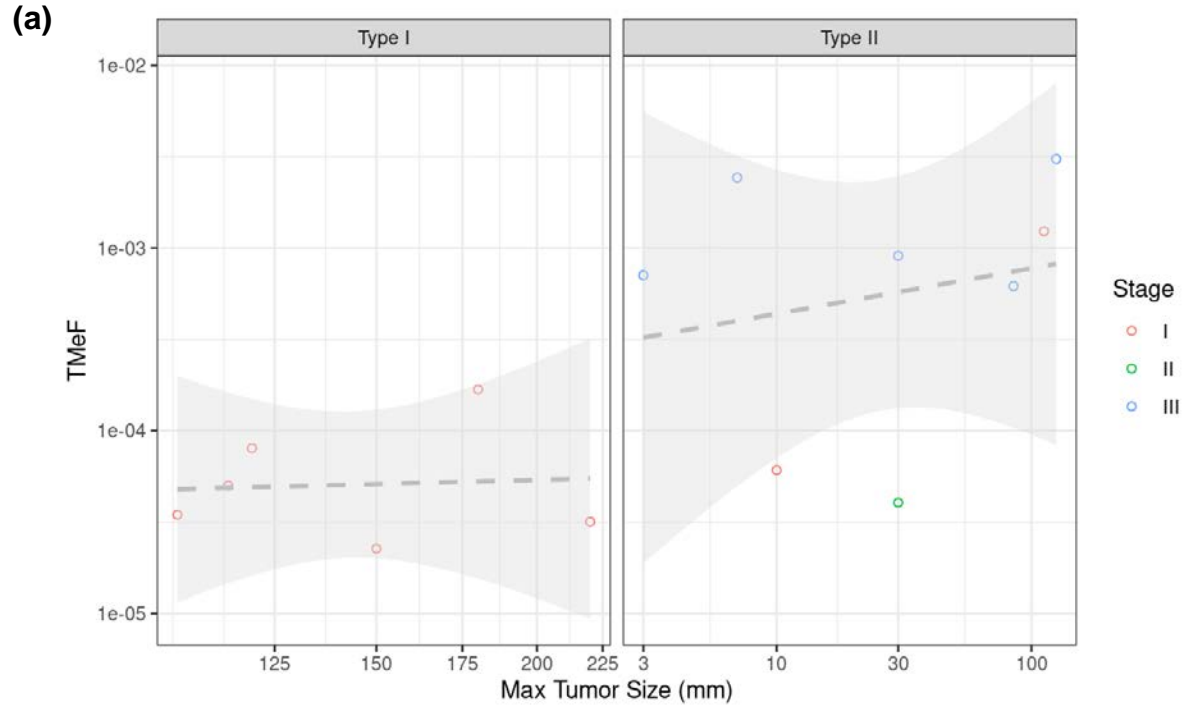

(b)

| Term                      | Value       | P-value | Subtype |
|---------------------------|-------------|---------|---------|
| Slope                     | $10^{-11}$  | 0.3     | Type I  |
| Tumor-size scaling factor | 0.18        | >0.9    | Type I  |
| Slope                     | $10^{-8.3}$ | <0.001* | Type II |
| Tumor-size scaling factor | 0.25        | 0.5     | Type II |

**Figure S9. Association of TMeF with tumor size in ovarian cancer.** (a) TMeF was plotted against the maximum tumor size for type I and type II ovarian cancer participants. (b) Tumor shedding as a function of tumor size was modeled (see Methods) to ascertain both a measurement of the linear slope between TMeF and tumor size (observed as an intercept offset on the log-log plot) and the scaling factor associated with tumor size (observed as a slope on the log-log plot). \* $p < 0.05$ .

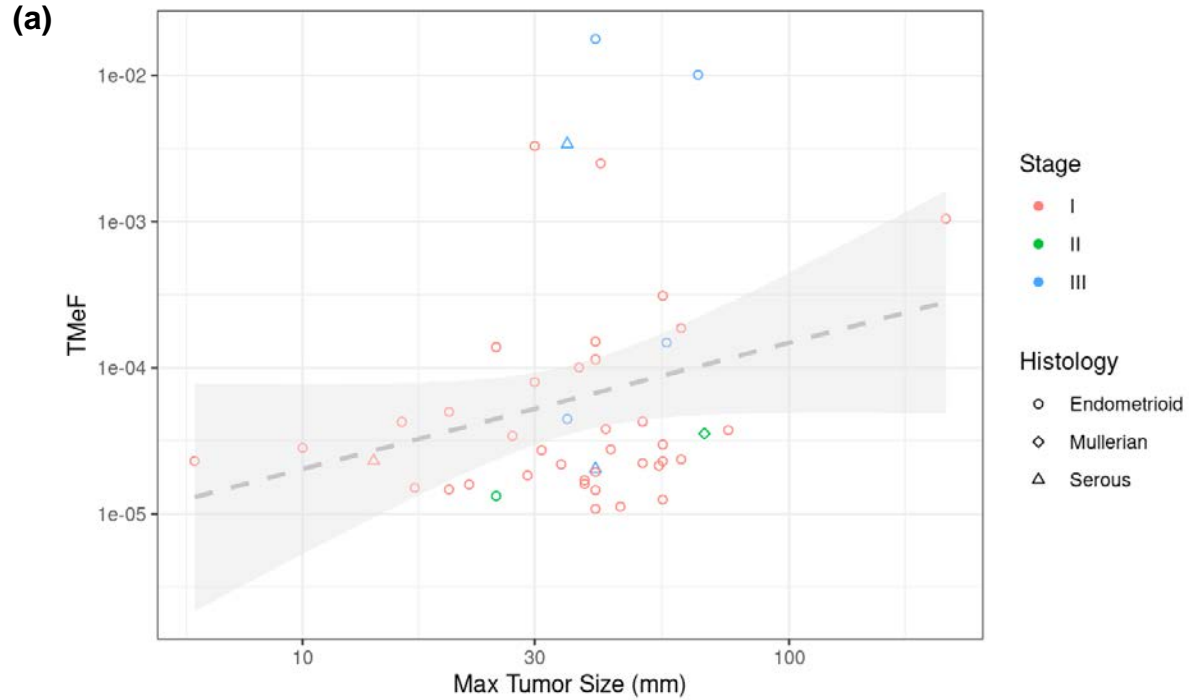

(b)

| Term                      | Value      | P-value |
|---------------------------|------------|---------|
| Slope                     | $10^{-13}$ | <0.001* |
| Tumor-size scaling factor | 0.84       | 0.07    |

**Figure S10. Association of TMeF with tumor size in uterine cancer.** (a) TMeF was plotted against the maximum tumor size for uterine cancer participants. (b) Tumor shedding as a function of tumor size was modeled (see Methods) to ascertain both a measurement of the linear slope between TMeF and tumor size (observed as an intercept offset on the log-log plot) and the scaling factor associated with tumor size (observed as a slope on the log-log plot). The model is included for completeness; however, the fit was poor. This may be due to the limit of quantification of TMeF and/or the importance of unmodeled tumor characteristics. \* $p < 0.05$ .

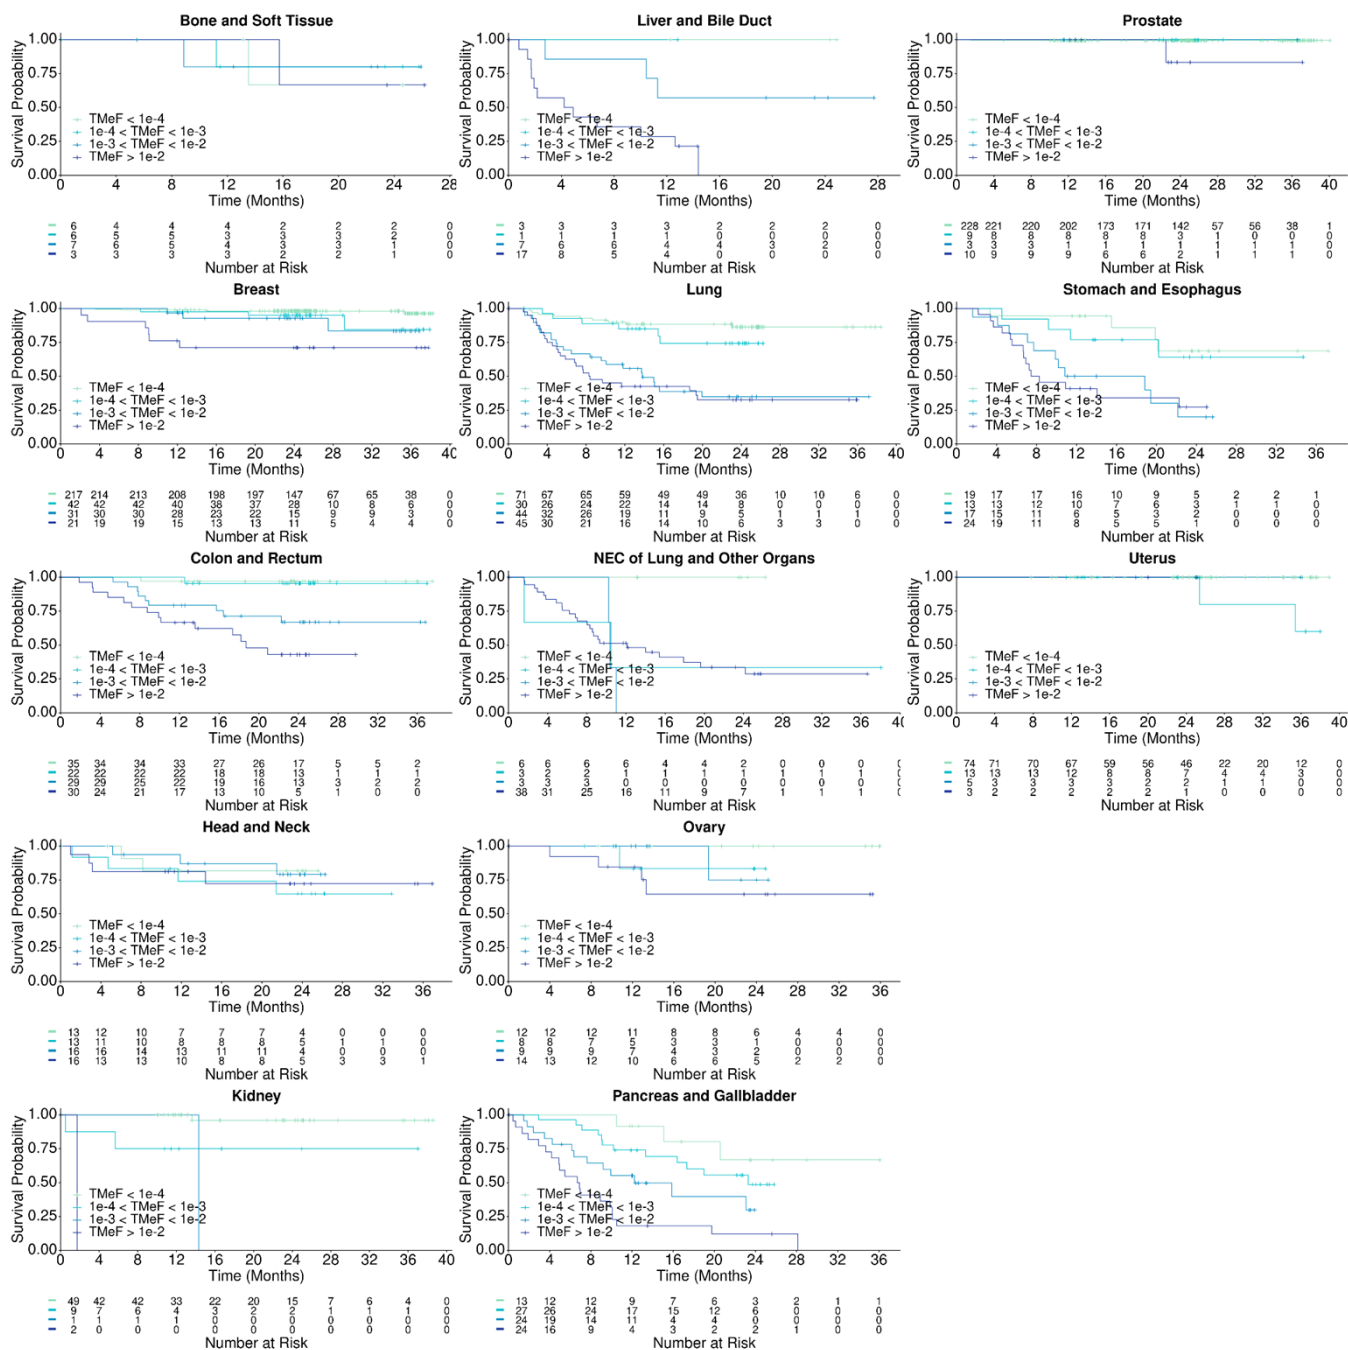

**Figure S11. Survival stratified by TMeF for individual cancer labels.**

Participant samples were stratified by their TMeF, and Kaplan Meier plots were generated for cancer labels where 20 or more participants had survival data available.

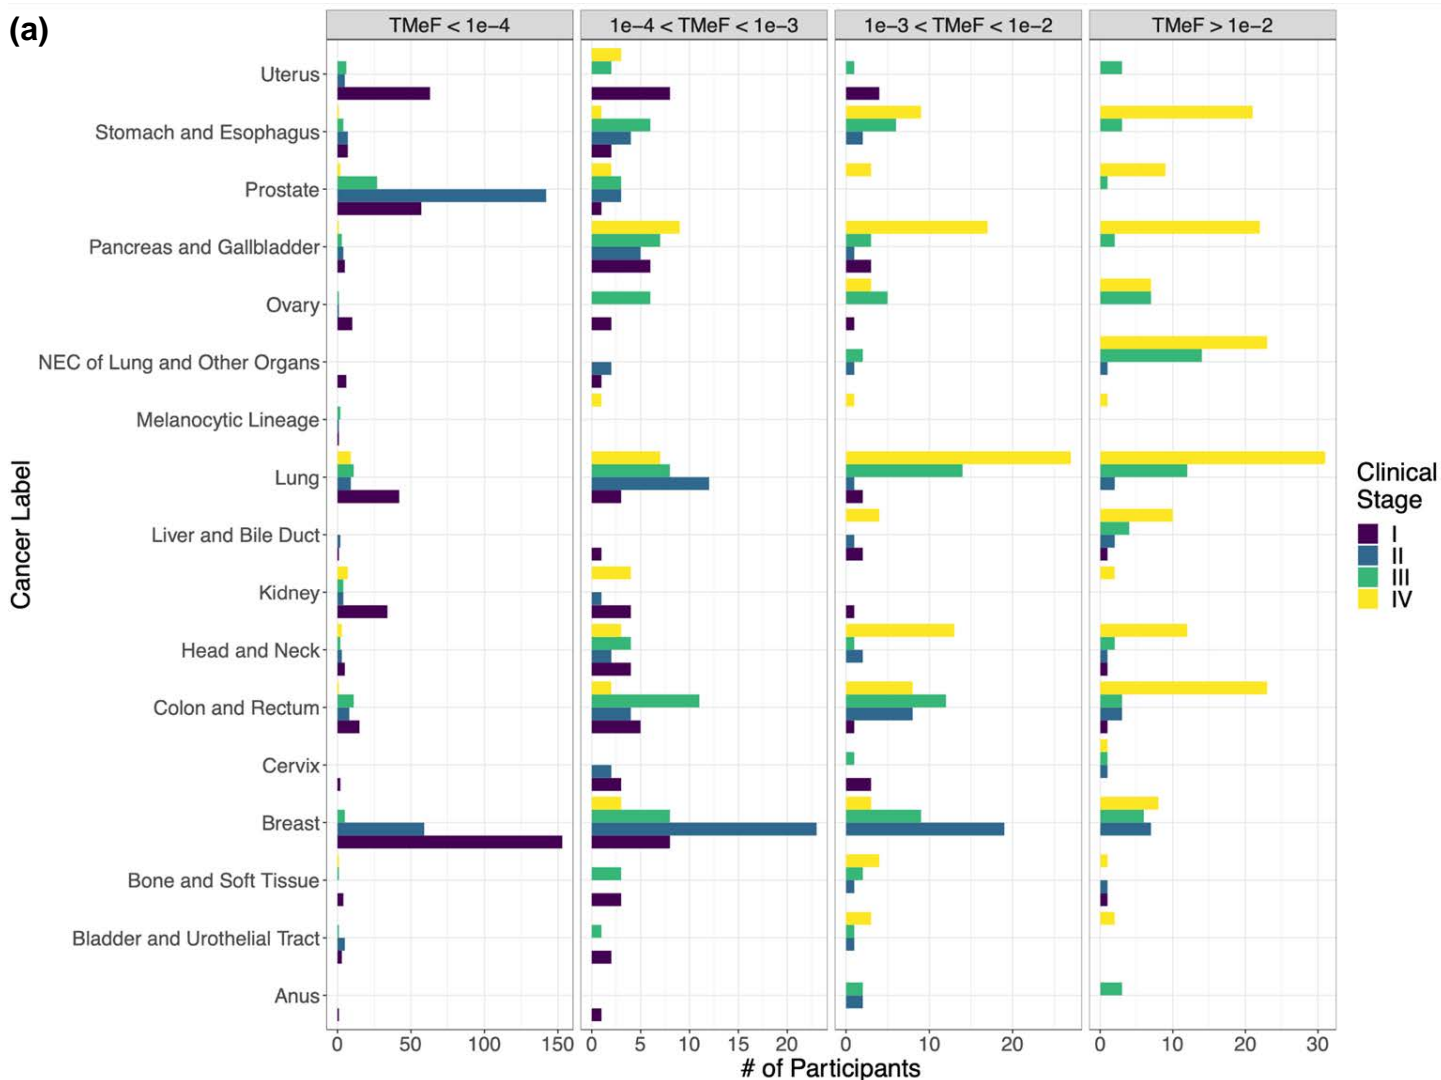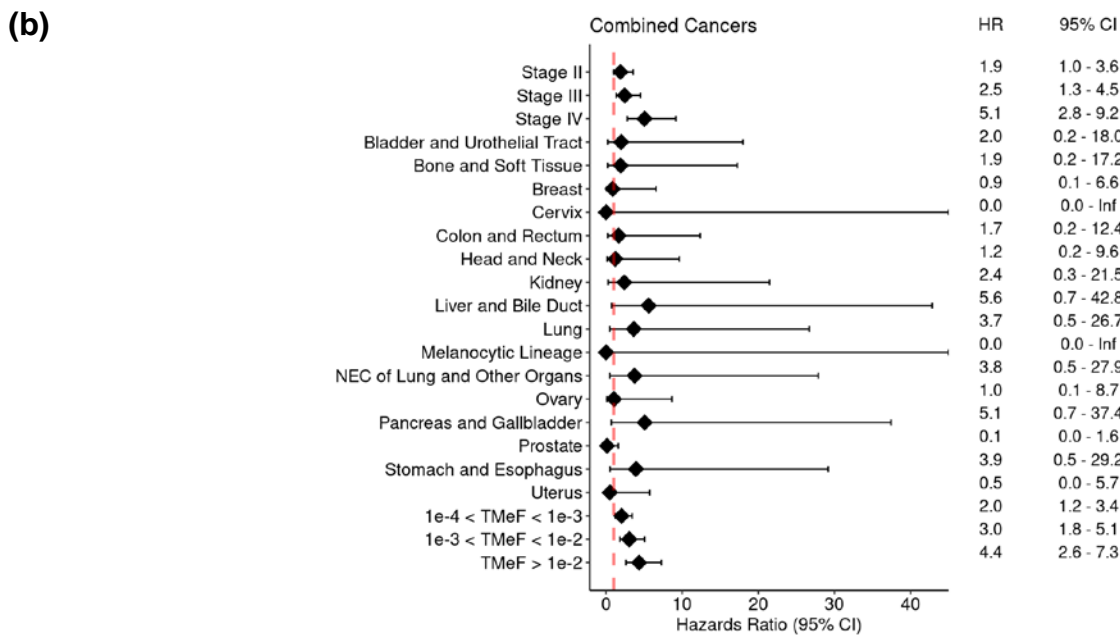

**Figure S12. Cancer spectrum by clinical stage and TMeF stratum.**

(a) TMeF was calculated for 1434 pre-treatment, solid cancer samples from CCGA substudy 3. Counts of samples stratified by clinical stage and cancer label are shown for each of 4 TMeF stratum. Low TMeF samples were enriched for earlier-stage cancers; whereas, high TMeF samples were enriched for later-stages. (b) A Cox proportional hazards model with clinical stage, cancer label, and stratified TMeF was fit across all cancer samples. A forest plot depicts the hazard ratios for each covariate. Caveats of the model and associated hazard ratios are described in the Results.

# Reported Lower Limit of Accurate Tissue-Free Quantification

| Assay Type | <0.1% | 0.1-1%                                                 | 1–10%                                      | Not Assessed                     |
|------------|-------|--------------------------------------------------------|--------------------------------------------|----------------------------------|
|            |       |                                                        | SRFD <sup>a</sup><br>NNLS <sup>b</sup>     |                                  |
|            |       | cfSort <sup>c</sup><br>Cancer<br>Detector <sup>d</sup> | CelFEER <sup>e</sup><br>caHMH <sup>f</sup> | Sun <i>et al.</i> <sup>g</sup>   |
|            |       |                                                        | caHMH <sup>f</sup>                         |                                  |
|            |       |                                                        |                                            | Shen <i>et al.</i> <sup>*</sup>  |
|            |       |                                                        |                                            | Liang <i>et al.</i> <sup>*</sup> |
|            | TMeF  |                                                        |                                            |                                  |

<sup>\*</sup>Shen *et al.* 2018 [ref 42] and Liang *et al.* 2021 [ref 40] demonstrate low quantitative accuracy with a tissue-informed approach utilizing cell line mixtures.

<sup>a</sup>Zhou *et al.* 2022 [ref 43]; <sup>b</sup>Moss *et al.* 2018 [ref 38]; <sup>c</sup>Li *et al.* 2023 [ref 46]; <sup>d</sup>Li *et al.* 2018 [ref 39]; <sup>e</sup>Keukeleire *et al.* 2023 [ref 45]; <sup>f</sup>Guo *et al.* 2017 [ref 41]; <sup>g</sup>Sun *et al.* 2015 [ref 44].

**Figure S13. Review of tissue-free, methylation-based ctDNA abundance methods and assays.** A 2-dimensional grid depicting assay types (y-axis) and the assessed lower limit of accurate tissue-free quantification (x-axis) for the current presented approach (TMeF) and prior works that utilize methylation patterns to measure ctDNA abundance.
